# Supplementary material
Source: publisher site journal article supplement (https://www.dovepress.com/article/528466)
Supplement: Supplementary file 1 [file 528466%20Revised%20Supplementary%20Materials.docx]

Table S1 Main instruments and reagents

| TRIzol reagent | Tiangen Biochemical Technology Co., Ltd; Beijing, China |
| --- | --- |
| Protein Extraction Kit | Biyuntian Biotechnology Co., Ltd, P8680; Solebao, China |
| Protein concentration assay kit | Tiangen Biochemical Technology Co., LTD, Beijing, China |
| ELISA Kit | Shanghai Biyuntian Biotechnology Co., Ltd., Shanghai, China |
| Light microscope | ZEISS Imager A2, Germany |
| Laser scanning confocal microscopy | Affinity Biosciences |
| Microplate reader | Tanon, Shanghai, China |
| Amino acids in PN solution | China Resources Shuanghe Pharmaceutical Co., Ltd., China |
| Glucose in PN solution | Otsuka Pharmaceutical Co., Ltd., China |
| Fat emulsionin PN solution | Fresenius Kabi Huarui Pharmaceutical Co., Ltd., China |
| TNF-α antibody | Abbot (Shanghai) Trading Co., Ltd,China |
| IL-10 antibody | Wuhan Booute Biotechnology Co., Ltd,China |
| SOD kit | Nanjing Jiancheng Bioengineering Research Institute Co., Ltd.China |
| MDA kit | Nanjing Jiancheng Bioengineering Research Institute Co., Ltd.China |
| Hydroxyl free radical assay kit | Jiangsu Kaiji Biotechnology Co., Ltd,China |
| GSH-Px kit | Nanjing Jiancheng Bioengineering Research Institute Co., Ltd.China |
| Reactive oxygen species (ROS) assay kit | Nanjing Jiancheng Bioengineering Research Institute Co., Ltd.China |
| Peripheral Blood Mononuclear Cell (PBMC) Isolation Solution | Beijing Solarbio Science & Technology Co., Ltd.China |
| Animal Peripheral Blood Mononuclear Cell Isolation Kit | Beijing Solarbio Science & Technology Co., Ltd.China |
| cDNA | Chongqing Golden Wheat Biotechnology Co., Ltd., China |
| 0.1ml 10mM DCFH-DA in DMSO | Nanjing Jiancheng Bioengineering Research Institute Co., Ltd.China |

Table S2 Key antibody information

| Antibody name | Article No. | Source | dilution ratio of antibodies | Dilution ratio of secondary antibody |
| --- | --- | --- | --- | --- |
| MRPL35 | Affinity-DF3668 | Rabbit | 1:500 | 1：1000 |
| P65 | Novus-NB100-2176 | Rabbit | 1:500 | 1：1000 |
| p-P65 | Novus-NB100-82088 | Rabbit | 1:500 | 1：1000 |
| JNK | SANTA-SC-7345 | Mouse | 1:500 | 1：1000 |
| p-JNK | SANTA-SC-6254 | Mouse | 1:500 | 1：1000 |
| β-actin | Santa-sc-47778 | Mouse | 1:1000 | 1：1000 |

Table S3 qRT-PCR primer sequences used in this study.

| Gene | Sequence (5’‐ 3’)（rat） | Sequence (5’‐ 3’)（human） |
| --- | --- | --- |
| MRPL35 | F5'-CAGTTGTTTCCTCTGCTCCAAG-3' | F5'-TTTGGCATCTTCAACCTACCG -3' |
| R5'-TTCTTATAGCCAGCCTTTCTCCT-3' | R5'-CCAGCCTTTCTCCTCACCCA -3' |
| GAPDH | F5'-GGCCTTCCGTGTTCCTACC-3' | F5'-GCACCGTCAAGGCTGAGAAC -3' |
| R5'-CGCCTGCTTCACCACCTTC-3' | R5'-TGGTGAAGACGCCAGTGGA -3' |


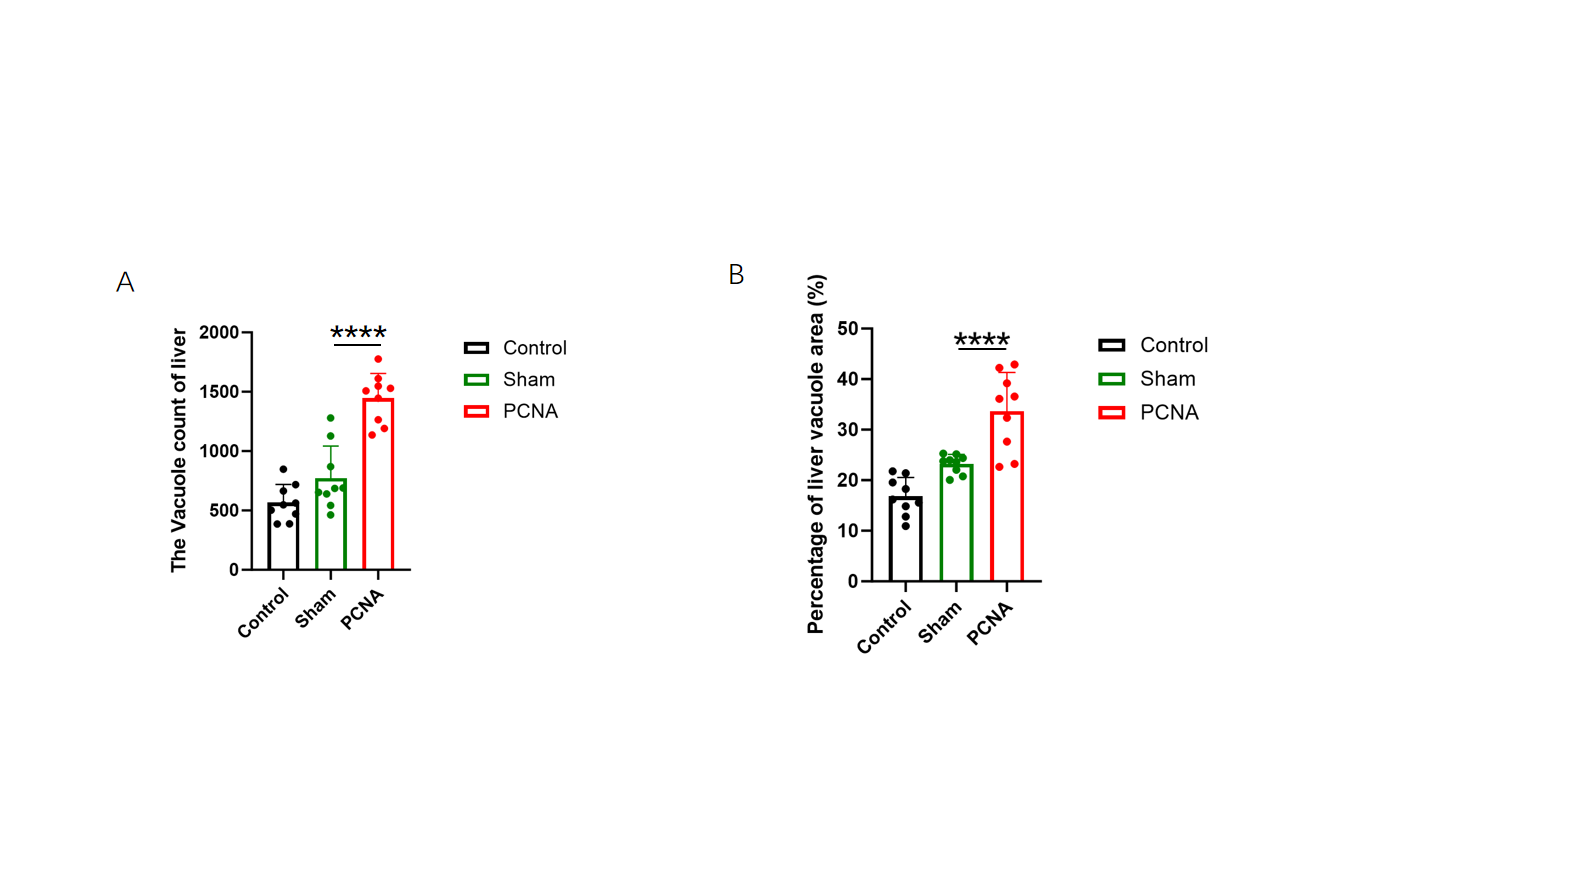

**Figure S1. The count of hepatocyte vacuoles and the percentage of hepatocyte vacuolar area**.

1. The count of hepatocyte vacuoles. *****P*<0.0001. (B) The percentage of the area of hepatocyte vacuoles. *****P*<0.0001.


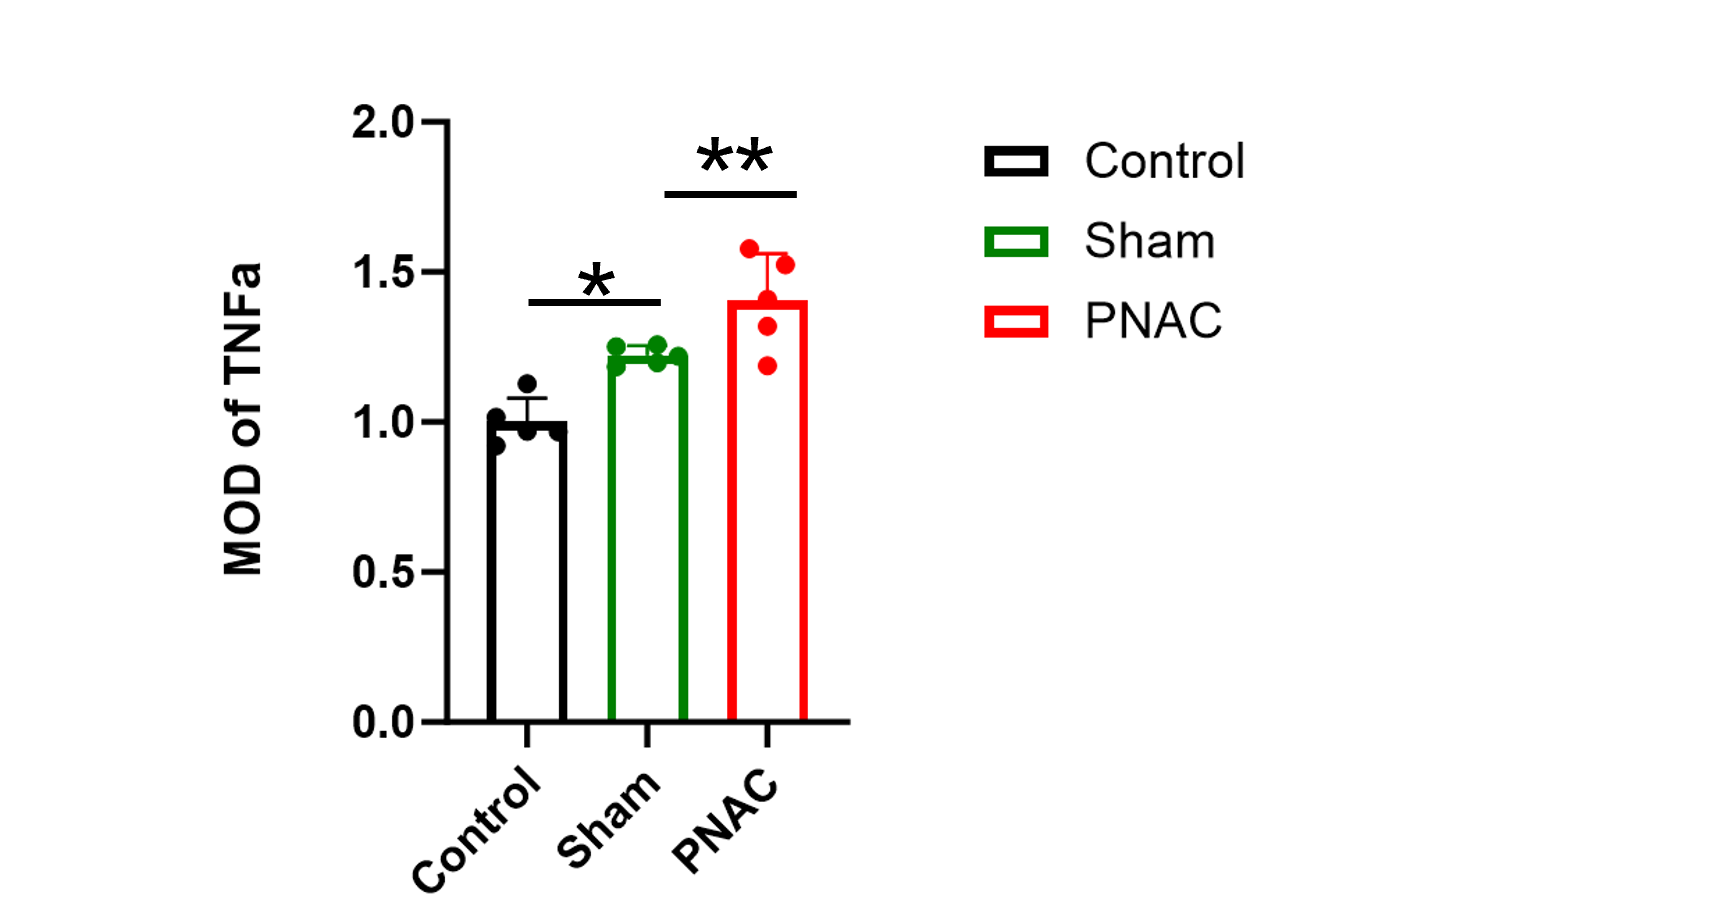

**Figure S2. The mean optical density value of TNF-α.**

The mean optical density value of TNF-α. **P*<0.05, ***P*<0.01.


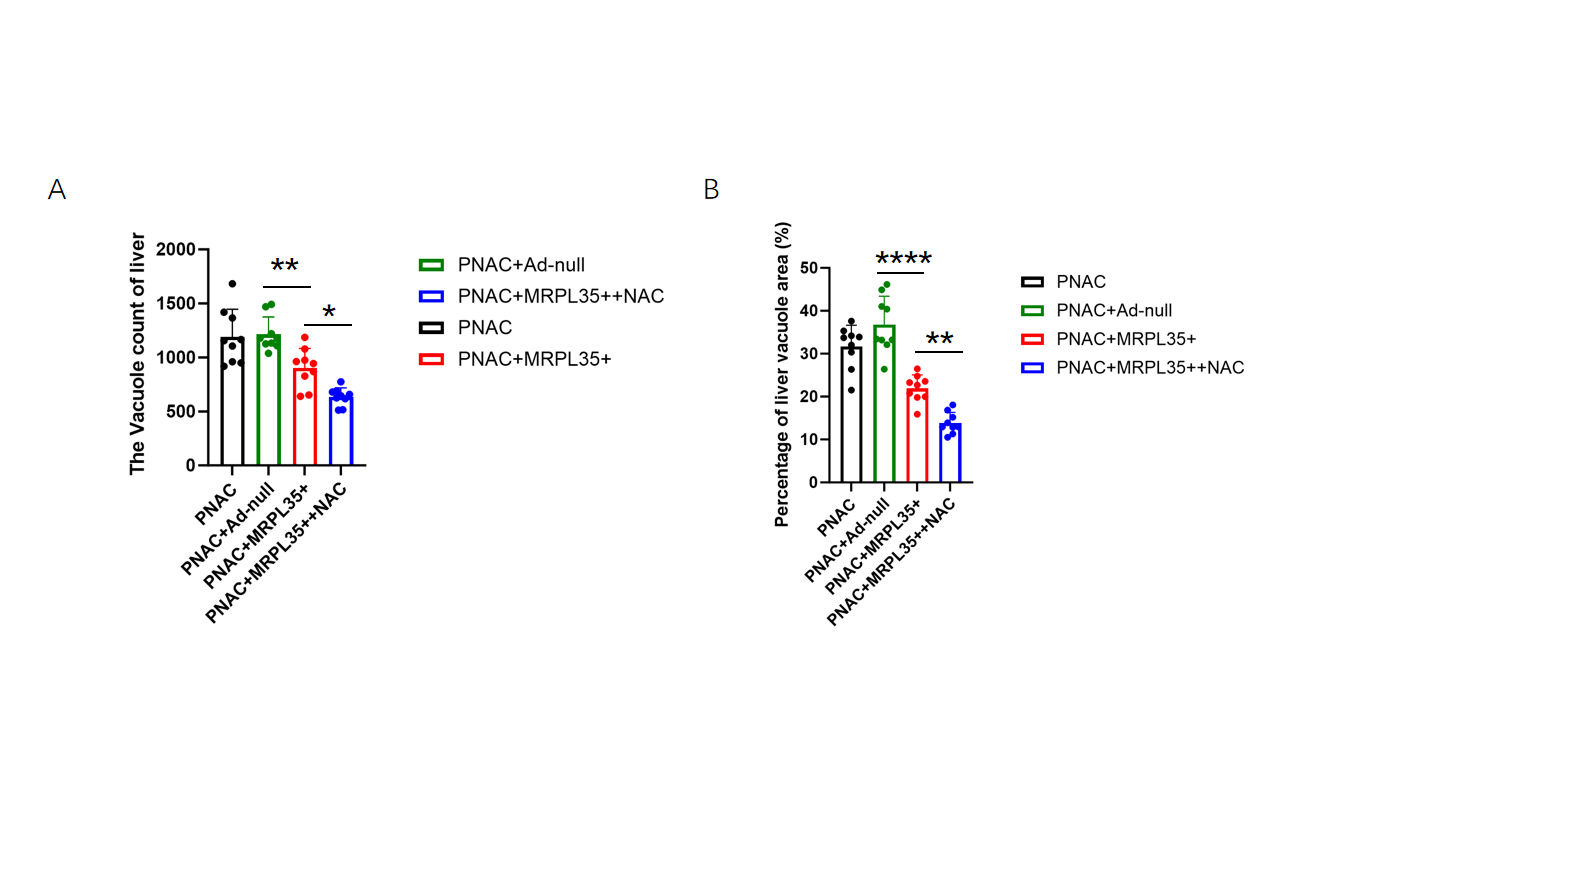

**Figure S3. The count of hepatocyte vacuoles and the percentage of hepatocyte vacuolar area**.

1. The count of hepatocyte vacuoles.***P*<0.01,**P*<0.05. (B) The percentage of the area of hepatocyte vacuoles. ***P*<0.01, *****P*<0.0001.

**
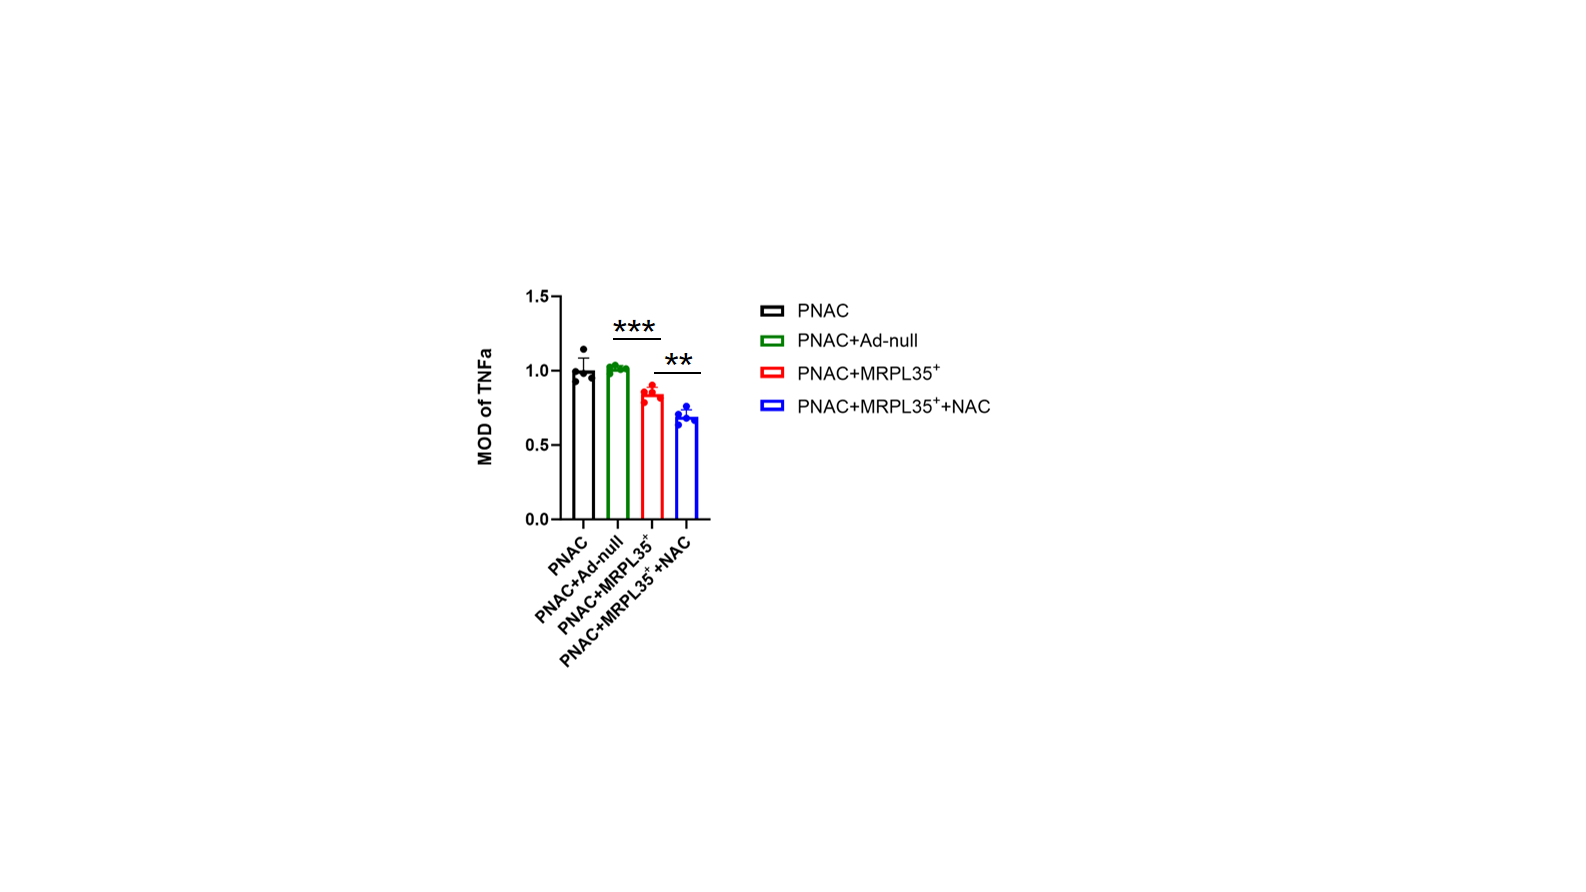

Figure S4. The mean optical density value of TNF-α.**

The mean optical density value of TNF-α. ***P*<0.01, ****P*<0.001.
